# Supplementary material for: The Characterization of G-Quadruplexes in Tobacco Genome and Their Function under Abiotic Stress
Source: Int J Mol Sci. 2024 Apr 14;25(8):4331. doi: 10.3390/ijms25084331 (PMC11050182; doi:10.3390/ijms25084331)
Supplement: Supplementary file 1 [file ijms-25-04331-s001.zip › Supplementary Tables.xlsx]

## Sheet: Table S1
Table S1 The number of SSRs involved in G-quadruplexes formation.
Number of G-quadruplexes formed by SSRs	SSRs number
1	4792
2	757
3	216
4	78
5	28
6	17
7	6
8	4
9	2
10	1
11	1
12	1
13	1
14	1
15	2
total	5907

## Sheet: Table S2
Table S2 The number of G-quadruplexes in feature regions of tobacco genome.
Feature region	template strand	coding strand	double strand
promoter2000	21846	28983	50829
promoter1500	16336	23068	39404
promoter1000	10630	17161	27791
promoter500	5290	10956	16246
TSS500	6446	12235	18681
5'UTR	264	578	842
exon	19490	10853	30343
CDS	19092	10114	29206
intron	48181	43897	92078
3'UTR	266	218	484
gene	65478	54229	119707
intergenic	1471819	1482620	2954439

## Sheet: Table S3
Table S3 The number of DEGs and nDEGs under drought stress and NaCl stress.
Stress type	Total genes	DEGs	nDEGs
drought	35519	7477	28042
salt	35519	2764	32755

## Sheet: Table S4
Table S4 The number of G-quadruplexes of DEGs and nDEGs under drought stress and salt stress.
Feature region	Drought stress		NaCl stress
	DEGs	nDEGs	DEGs	nDEGs
promoter2000	10893	39936	3730	47099
promoter1500	8632	30772	2896	36508
promoter1000	6235	21556	2081	25710
promoter500	3891	12355	1282	14964
TSS500	4717	13964	1417	17264
5'UTR	250	592	60	782
3'UTR	209	275	47	437
gene	25219	94488	6363	113344
exon	8603	21740	2393	27950
CDS	8202	21004	2295	26911
intron	17261	74817	4164	87914

## Sheet: Table S5
Table S5 The number of G-quadruplexes in DEGs under drought stress.
Feature region	Up-regulated genes			Down-regulated genes
	double strand	template strand	coding strand	double strand	template strand	coding strand
promoter2000	3822	1544	2278	7071	2753	4318
promoter1500	3027	1162	1865	5605	2084	3521
promoter1000	2132	727	1405	4103	1387	2716
promoter500	1374	388	986	2517	653	1864
TSS500	1706	507	1199	3011	724	2287
5'UTR	74	14	60	176	45	131
3'UTR	61	34	27	148	79	69
gene	11268	6474	4794	13951	7363	6588
exon	3487	2361	1126	5116	2971	2145
CDS	3369	2325	1044	4833	2870	1963
intron	8004	4297	3707	9257	4716	4541

## Sheet: Table S6
Table S6 The number of G-quadruplexes in DEGs under NaCl stress.
Feature region	Up-regulated genes			Down-regulated genes
	double strand	template strand	coding strand	double strand	template strand	coding strand
promoter2000	1558	573	985	2172	883	1289
promoter1500	1195	415	780	1701	637	1064
promoter1000	866	273	593	1215	383	832
promoter500	543	145	398	739	174	565
TSS500	572	153	419	845	191	654
5'UTR	18	3	15	42	10	32
3'UTR	14	10	4	33	24	9
gene	2818	1574	1244	3545	1830	1715
exon	1024	679	345	1369	784	585
CDS	994	668	326	1301	754	547
intron	1874	963	911	2290	1136	1154
